# Supplementary material for: Delays in Seeking General Medical Services and Measurable Abnormalities Among Individuals With Serious Mental Illness
Source: Atypon-hosted journal article supplement (doi:10.1176/appi.ps.201700327), 2018-02-15
Supplement: appi.ps.201700327.ds001.pdf [file appi.ps.201700327.ds001.pdf]

| Appendix A: Barriers to receiving general medical care. <sup>a</sup>                                                                                                                                  |     |    |
|-------------------------------------------------------------------------------------------------------------------------------------------------------------------------------------------------------|-----|----|
|                                                                                                                                                                                                       | n   | %  |
| ...You couldn't get through on the telephone                                                                                                                                                          | 60  | 22 |
| ...You couldn't get an appointment soon enough.                                                                                                                                                       | 89  | 33 |
| ...Once you get there, you have to wait too long to see a doctor?                                                                                                                                     | 66  | 24 |
| ...The (clinic/doctor's) office wasn't open when you could get there.                                                                                                                                 | 40  | 15 |
| ...You didn't have transportation.                                                                                                                                                                    | 73  | 27 |
| ...You did not have health insurance or could not afford to receive care?                                                                                                                             | 67  | 25 |
| ...You were concerned that you would be treated differently because of your mental illness.                                                                                                           | 39  | 16 |
| More than one barrier                                                                                                                                                                                 | 108 | 40 |
| <sup>a</sup> Each question was prefaced by "There are many reasons people delay getting physical medical care. Have you delayed getting care for any of the following reasons in the past 12 months." |     |    |

| Appendix B: Non-imputed data logistic regression analysis results for association of medical care delay and blood pressure <sup>a</sup> and Hemoglobin A1C. <sup>a</sup> |                        |            |      |
|--------------------------------------------------------------------------------------------------------------------------------------------------------------------------|------------------------|------------|------|
|                                                                                                                                                                          | Abnormal HbA1C (n=105) |            |      |
|                                                                                                                                                                          | AOR                    | 95% CI     | p    |
| Care Delay                                                                                                                                                               | 3.42                   | 1.01-11.56 | .048 |
| Female (reference: male)                                                                                                                                                 | .90                    | .32-2.60   | .851 |
| Age <sup>b</sup>                                                                                                                                                         | 1.10                   | .64-1.89   | .724 |
| Education (reference: less than high school)                                                                                                                             |                        |            |      |
| HS Diploma/GED                                                                                                                                                           | 1.51                   | .46-4.99   | .495 |
| College                                                                                                                                                                  | .25                    | .06-1.09   | .065 |
| Race (reference: white)                                                                                                                                                  |                        |            |      |
| Black                                                                                                                                                                    | 2.72                   | .75-9.90   | .128 |
| Other                                                                                                                                                                    | 3.51                   | 0.66-18.62 | .140 |
| Clinical Diagnosis (reference: schizophrenia)                                                                                                                            |                        |            |      |
| Bipolar                                                                                                                                                                  | .91                    | .21-3.92   | .902 |
| Depression                                                                                                                                                               | .76                    | .13-4.52   | .761 |
| Psychosis NOS                                                                                                                                                            | 1.56                   | .08-31.17  | .759 |
| Employment (reference: unemployed)                                                                                                                                       |                        |            |      |
| Employed                                                                                                                                                                 | 1.83                   | .28-12.22  | .532 |
| Receipt of preventive care (reference: none)                                                                                                                             |                        |            |      |
| At a public clinic                                                                                                                                                       | .04                    | .00-0.47   | .010 |
| HMO or private                                                                                                                                                           | .26                    | .04-1.86   | .180 |
| Other                                                                                                                                                                    | .09                    | .00-2.08   | .131 |
| Taking antipsychotic (reference: no)                                                                                                                                     |                        |            |      |
| Yes                                                                                                                                                                      | 2.36                   | .74-7.54   | .148 |
| Diabetes Diagnosis (reference: no)                                                                                                                                       |                        |            |      |
| Yes                                                                                                                                                                      | 8.24                   | 1.91-35.62 | .005 |
| <sup>b</sup> Abnormal HbA1C defined as $\geq 5.7$ mg/dL                                                                                                                  |                        |            |      |
| <sup>d</sup> Continuous variable of age was entered in 10-year units.                                                                                                    |                        |            |      |
